# Supplementary material for: Unlocking Short Read Sequencing for Metagenomics
Source: PubMed Central journal article supplement (PMC2911387; doi:10.1371/journal.pone.0011840), 2010-07-28
Supplement: pone.0011840.s001.pdf [file pone.0011840.s001.pdf]

-  Prochlorococcus marinus
-  Bacteria
-  Candidatus Pelagibacter
-  cellular organisms
-  root
-  Proteobacteria
-  Cyanobacteria
-  Candidatus Pelagibacter sp. HTCC7211
-  Alphaproteobacteria
-  Gammaproteobacteria
-  Bacteroidetes
-  SAR11 cluster
-  Psychroflexus torquis ATCC 700755
-  Prochlorococcus phage P-SSM2
-  Alteromonas macleodii
-  Candidatus Pelagibacter ubique
-  Not assigned
-  Rhodobacterales
-  Viruses
-  Flavobacteria
-  Prochlorococcus phage P-SSP7
-  Candidatus Pelagibacter ubique HTCC1062
-  Alteromonas macleodii ATCC 27126
-  Prochlorococcus marinus str. AS9601
-  Prochlorococcus marinus str. MIT 9312
